# Supplementary material for: User Satisfaction Evaluation of the EHR4CR Query Builder: A Multisite Patient Count Cohort System
Source: Hindawi journal article supplement (doi:10.1155/2015/801436), 2015-01-01
Supplement: f1 [file 801436.f1.pdf]

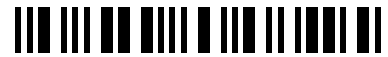

**Dear study participant,**

**The purpose of this questionnaire is to assess your experiences and satisfaction with the user interface (UI) of the Query Builder you have tested and the training you received before.**

**By completing it, you are enabling us to remedy any shortcomings or weaknesses identified.**

**The questionnaire consists of four parts:**

**Section A: Post-Task Assessment: is for assessing your experience with the Query Builder after each task.**

**Section B: Usability and Acceptance of the Query Builder: is for your overall assessment of the Query Builder after all tasks are completed.**

**Section C: Suitability of the Training: is for your evaluation of the training you received.**

**Section D: Background Information : is for collecting demographic data which allows for a scientifically sound interpretation of the test results.**



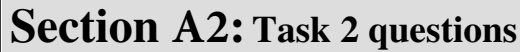

### A2.1.

## A2.2.

### A2.3.

### A2.4.

**A2.5. If you marked the box for “strongly disagree “ or “disagree”:**  
**function or features do you miss for this task?**

[illegible]

**A2.6. Please take a snapshot of the query generated and upload it here**

**A2.7. Please take a snapshot of the RESULTS and upload it here**

### Section A3: Task 3 Questions

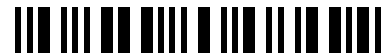

|                                                                                     | strongly<br>disagree     | disagree                 | neither<br>agree or<br>disagree | agree                    | strongly<br>agree        | cannot be<br>assessed    |
|-------------------------------------------------------------------------------------|--------------------------|--------------------------|---------------------------------|--------------------------|--------------------------|--------------------------|
| I found the Query Builder unnecessarily complex.                                    | <input type="checkbox"/> | <input type="checkbox"/> | <input type="checkbox"/>        | <input type="checkbox"/> | <input type="checkbox"/> | <input type="checkbox"/> |
| I thought the Query Builder was easy to use.                                        | <input type="checkbox"/> | <input type="checkbox"/> | <input type="checkbox"/>        | <input type="checkbox"/> | <input type="checkbox"/> | <input type="checkbox"/> |
| I think that I would need assistance to be able to use the Query Builder.           | <input type="checkbox"/> | <input type="checkbox"/> | <input type="checkbox"/>        | <input type="checkbox"/> | <input type="checkbox"/> | <input type="checkbox"/> |
| I found the various functions in the Query Builder were well integrated.            | <input type="checkbox"/> | <input type="checkbox"/> | <input type="checkbox"/>        | <input type="checkbox"/> | <input type="checkbox"/> | <input type="checkbox"/> |
| I thought there was too much inconsistency in the Query Builder.                    | <input type="checkbox"/> | <input type="checkbox"/> | <input type="checkbox"/>        | <input type="checkbox"/> | <input type="checkbox"/> | <input type="checkbox"/> |
| I would imagine that most people would learn to use the Query Builder very quickly. | <input type="checkbox"/> | <input type="checkbox"/> | <input type="checkbox"/>        | <input type="checkbox"/> | <input type="checkbox"/> | <input type="checkbox"/> |
| I found the Query Builder very cumbersome to use.                                   | <input type="checkbox"/> | <input type="checkbox"/> | <input type="checkbox"/>        | <input type="checkbox"/> | <input type="checkbox"/> | <input type="checkbox"/> |
| I felt very confident using the Query Builder.                                      | <input type="checkbox"/> | <input type="checkbox"/> | <input type="checkbox"/>        | <input type="checkbox"/> | <input type="checkbox"/> | <input type="checkbox"/> |
| I needed to learn a lot of things before I could get going with the Query Builder.  | <input type="checkbox"/> | <input type="checkbox"/> | <input type="checkbox"/>        | <input type="checkbox"/> | <input type="checkbox"/> | <input type="checkbox"/> |
| The user interface of the Query Builder is visually appealing.                      | <input type="checkbox"/> | <input type="checkbox"/> | <input type="checkbox"/>        | <input type="checkbox"/> | <input type="checkbox"/> | <input type="checkbox"/> |
| I feel comfortable using the Query Builder in English.                              | <input type="checkbox"/> | <input type="checkbox"/> | <input type="checkbox"/>        | <input type="checkbox"/> | <input type="checkbox"/> | <input type="checkbox"/> |
| I feel comfortable with the way of building a query.                                | <input type="checkbox"/> | <input type="checkbox"/> | <input type="checkbox"/>        | <input type="checkbox"/> | <input type="checkbox"/> | <input type="checkbox"/> |

**B2. What do you like about the Query Builder?**

**B3. What do you dislike about the Query Builder?/ What therefore should be improved?**

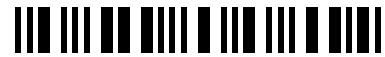

## Section C: Suitability of the Training

**C1. Please indicate your level of agreement with the statements listed below.**

|                                                                    | strongly<br>disagree     | disagree                 | neither<br>agree or<br>disagree | agree                    | strongly<br>agree        | cannot be<br>assessed    |
|--------------------------------------------------------------------|--------------------------|--------------------------|---------------------------------|--------------------------|--------------------------|--------------------------|
| The topics covered by the training were relevant for the tasks.    | <input type="checkbox"/> | <input type="checkbox"/> | <input type="checkbox"/>        | <input type="checkbox"/> | <input type="checkbox"/> | <input type="checkbox"/> |
| The time allotted for the training was sufficient.                 | <input type="checkbox"/> | <input type="checkbox"/> | <input type="checkbox"/>        | <input type="checkbox"/> | <input type="checkbox"/> | <input type="checkbox"/> |
| The content of the training was well organized and easy to follow. | <input type="checkbox"/> | <input type="checkbox"/> | <input type="checkbox"/>        | <input type="checkbox"/> | <input type="checkbox"/> | <input type="checkbox"/> |
| The materials distributed were helpful.                            | <input type="checkbox"/> | <input type="checkbox"/> | <input type="checkbox"/>        | <input type="checkbox"/> | <input type="checkbox"/> | <input type="checkbox"/> |
| The speed of the training video was appropriate.                   | <input type="checkbox"/> | <input type="checkbox"/> | <input type="checkbox"/>        | <input type="checkbox"/> | <input type="checkbox"/> | <input type="checkbox"/> |
| The amount of information was sufficient for solving the tasks.    | <input type="checkbox"/> | <input type="checkbox"/> | <input type="checkbox"/>        | <input type="checkbox"/> | <input type="checkbox"/> | <input type="checkbox"/> |
| This training experience will be useful in my work.                | <input type="checkbox"/> | <input type="checkbox"/> | <input type="checkbox"/>        | <input type="checkbox"/> | <input type="checkbox"/> | <input type="checkbox"/> |
| Overall, I am satisfied with the training.                         | <input type="checkbox"/> | <input type="checkbox"/> | <input type="checkbox"/>        | <input type="checkbox"/> | <input type="checkbox"/> | <input type="checkbox"/> |

**C2. If you have any suggestions, how the training material and the training process can be improved, please note them here:**

## Section D: Background Information

**D1. What is your age? (please specify)**

*Introduce a number (years)*

**D2. What is your gender?**

Female ☐

Male ☐

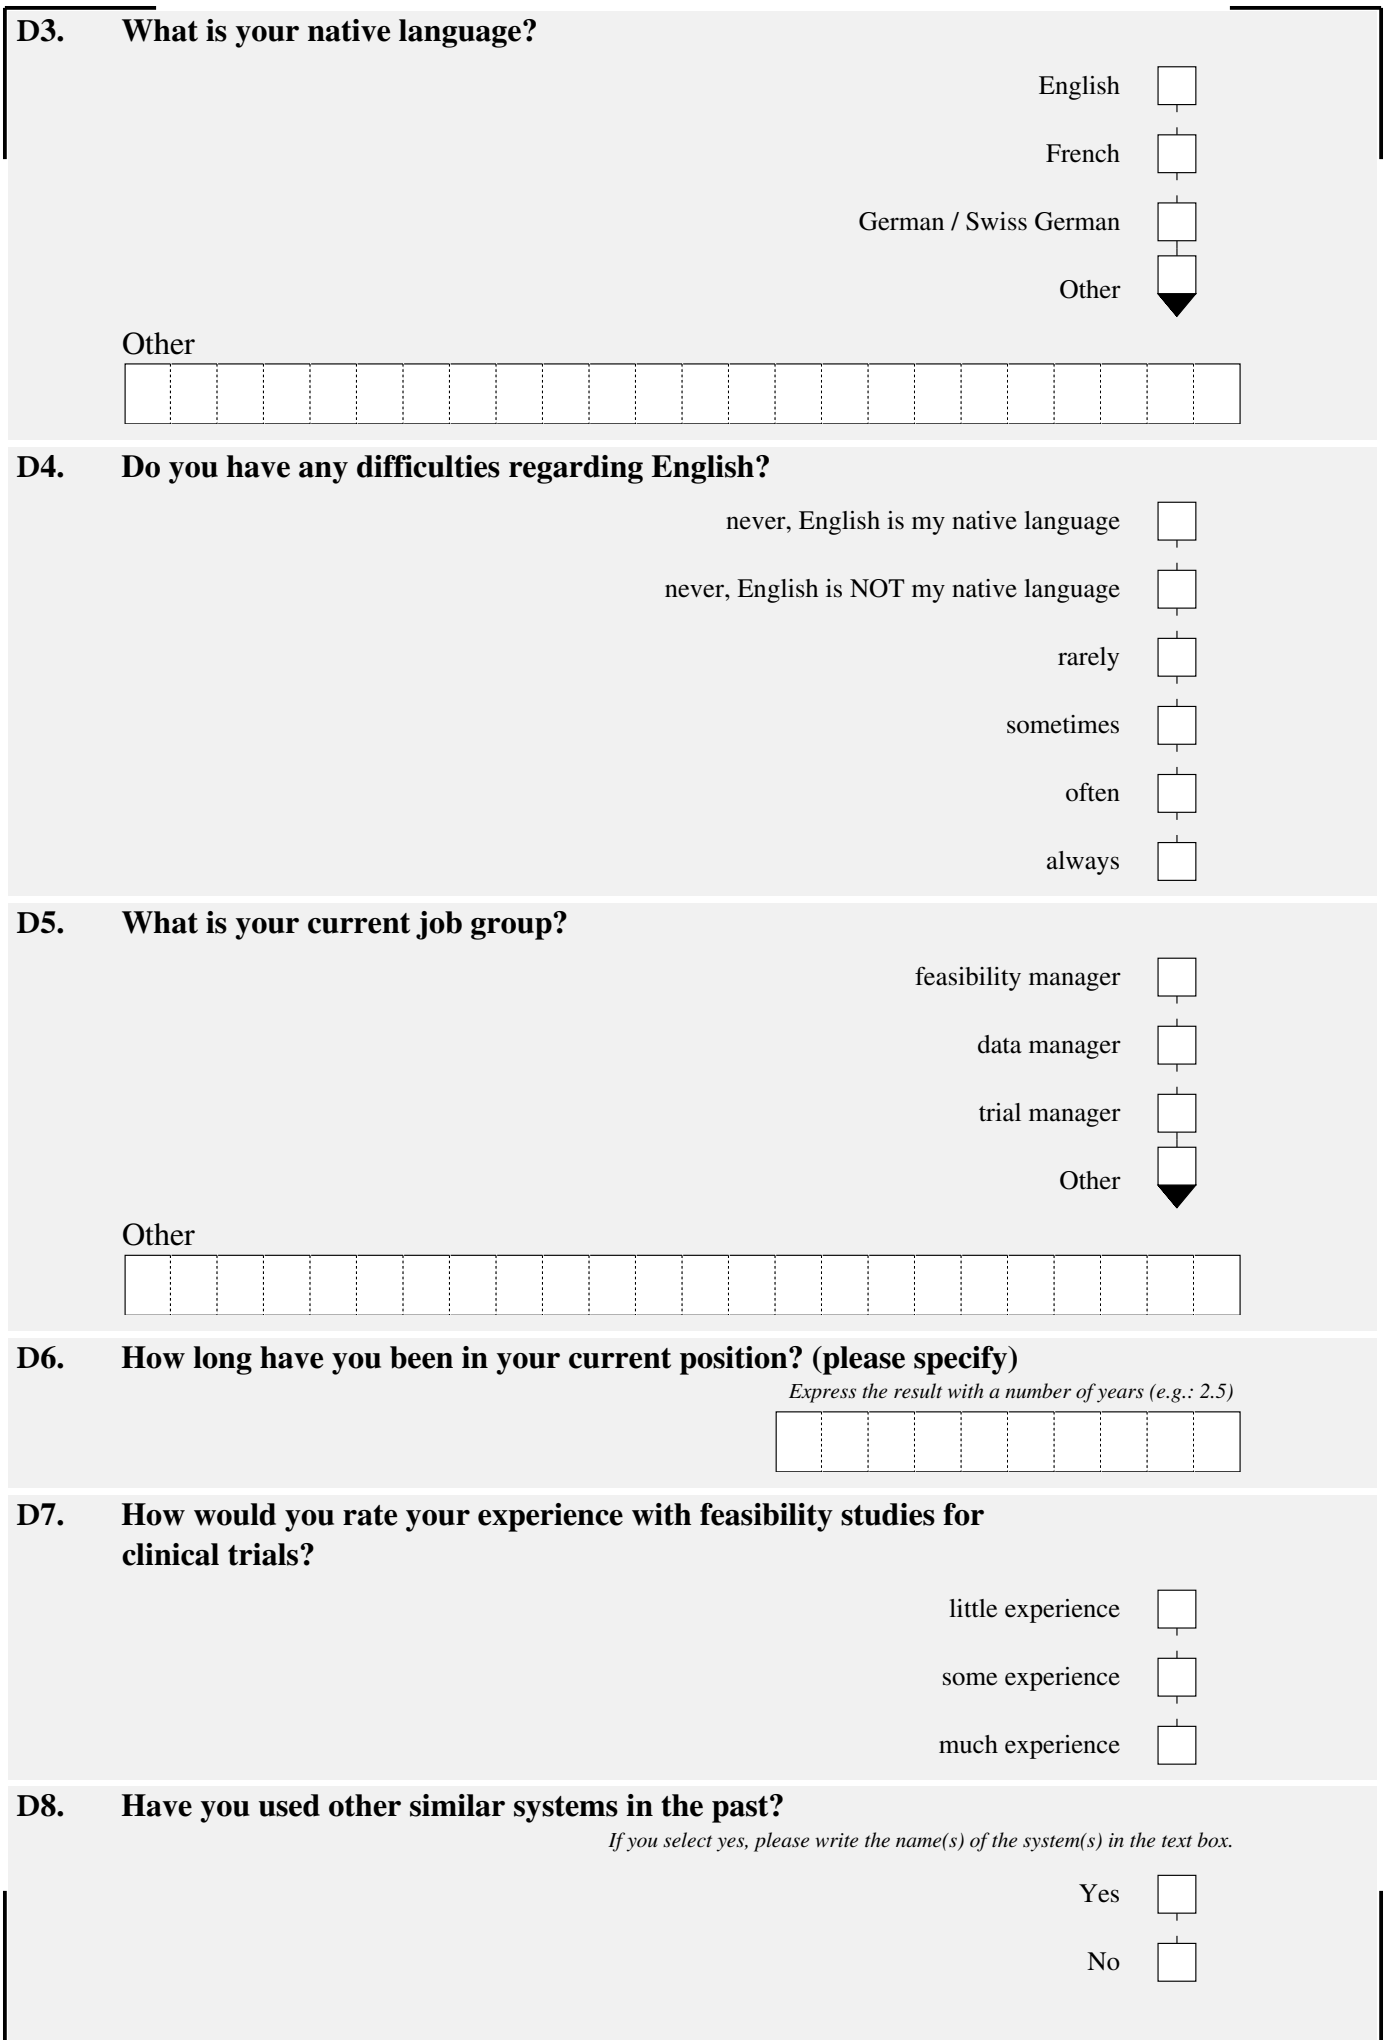

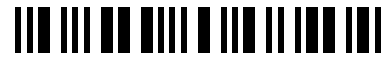

**D9.     How would you rate your computer skills?**

no computer skills     ☐

few computer skills     ☐

average computer skills     ☐

good computer skills     ☐

excellent computer skills     ☐

**D10.     How would you rate your knowledge in Boolean algebra (i.e. the usage of and/or/negation to construct truth values)?**

no knowledge     ☐

little knowledge     ☐

average knowledge     ☐

good knowledge     ☐

excellent knowledge     ☐

**D11.     Are there any other comments you would like to add?**
